# Supplementary material for: Genome sizes and repeatome evolution in zoantharians (Cnidaria: Hexacorallia: Zoantharia)
Source: PeerJ. 2023 Oct 16;11:e16188. doi: 10.7717/peerj.16188 (PMC10586311; doi:10.7717/peerj.16188)
Supplement: Supplemental Information 5 [file peerj-11-16188-s005.xlsx]

## Sheet: Table 1
Table S1: Specimen information of sequenced zoantharians.
Species	Original specimen number	Sampling date	Location	Depth (m)	GPS coordinates	Number of Gbp sequenced	GC%	Accession	SRA number	Mitochondrial genome Accession
Antipathozoanthus remengesaui	2073168	2014-06-27	Onna, Okinawa, Japan	15	N 26°26'20", E 127°47'7"	20.3	41.8	PRJNA598175	SRR11206917	OQ759540
Antipathozoantus obscurus	2073167	2014-08-14	Bise, Motobu, Okinawa, Japan	35	N 26°42'34", E 127°52'49"	19	52.3	PRJNA598176	SRR11206396	OQ759541
Bergia catenularis	JDR170610-4-30	2017-06-17	St Michiel, Curacao	20	12°08'05“N, 69°00'00“W	27.6	39.7	PRJNA662740	SRR12621188	OQ740722
Bergia puertoricense	JDR170612-7-45	2017-06-17	Marie Pampoen, Curacao	31	12°05'02“N, 68°54'01“W	23.9	39.4	PRJNA662980	SRR12626556	OQ740723
Epizoanthus illoricatus	328561	2015-02-27	Blue Corner, Palau	31	N 7°8'12",E 134°13'16"	19.9	41.4	PRJNA598181	SRR11206918	OQ740724
Epizoanthus planus	283861	2008-03-13	Hirajisone, Nagasaki, Japan	280	N 32°15'82", E °129'16"	9.4	42.4	PRJNA676135	SRR13036371	NA
Epizoanthus ramosus	760129	2019-09-19	Minnajima, Okinawa, Japan	210	N 26°38'41",E 127°47'34"	18.8	41.6	PRJNA598173	SRR11207078	OQ740725
Epizoanthus rinbou	1351471	2008-03-13	Hirajisone, Nagasaki, Japan	280	N 32°15'82", E °129'16"	21.5	39.9	PRJNA662986	SRR12626621	OQ740726
Epizoanthus scotinus	283864	2018-07-12	Sgaan Kinghlas-Bowie Seamount, Canada	86	N 53°18'5", E 135°40'36"	26.2	40.6	PRJNA662773	SRR12621595	OQ740727
Hydrozanthus tunicans	JDR170609-2-7	2017-06-09	Water Factory, Curacao	30	12°06'03“N, 68°57'01“W	23	39.1	PRJNA645597	SRR12201157	OQ740731
Hydrozoanthus antumbrosus	JDR191030-2-2	2019-10-30	It's Pretty Rough, Bonaire	25	N 12°04' 882'' , W 068°13'926''	26.8	39.7	PRJNA662983	SRR12626620	OQ740728
Hydrozoanthus gracilis	283869	2019-06-27	Cape Ose, Izu, Shizuoka, Japan	30	N 35°01'50", E 138°47'12"	22.3	39.7	PRJNA662988	SRR12626630	OQ740730
Hydrozoanthus sils	1320743	2015-09-13	Ngardmau, Palau	24	N 7°26′ 17.0′′ , E 134°36′ 49.4′′	23.3	39.5	PRJNA662735	SRR12621138	OQ740729
Paleozoanthus reticulatus	581563	1982-07-15	Transkei, South Africa	100	NA	14.7	62.2	PRJNA622546	SRR12621205	OQ843460 (contig), OQ848443 (COI)
Palythoa carribaeorum	180802-2.14	2018-08-02	Madagascar Reef, Sisal, Yucatan, Mexico	1	N 21°26’17” , W 90°16’39”	19.2	40.1	PRJNA598184	SRR11206360	OQ785262
Palythoa grandiflora	170419-65	2017-04-19	Puerto Viejo, Limon, Puerto Limon, Costa Rica	1	N 9°39'33", W 82°45'12"	19.5	38.4	PRJNA598185	SRR11206528	OQ785263
Palythoa grandis	JDR170613-10-62	2017-06-13	Tugboat, Curacao	12	12°04'00“N, 68°51'04“W	19.4	40.3	PRJNA580275	SRR12621764	OQ785264
Palythoa heliodiscus	JDR191205-1-1	2019-12-05	Mizugama, Kadena, Okinawa, Japan	8	N 26°21'33", E 127°44'17"	19.1	39.7	PRJNA598194	SRR11206406	OQ785265
Palythoa mizigama	A10	2018-07-08	Mizugama, Kadena, Okinawa, Japan	5	N 26°21'33", E 127°44'17"	16.6	38.3	PRJNA957836	SRR24234327	OQ785267
Palythoa mutuki	OKW13	2017-11-13	Adan Beach, Oku, Okinawa, Japan	3	N 26°49'21", E 128°18'45"	20	42.8	PRJNA598187	SRR11206913	OQ789241
Palythoa tuberculosa		2019-02-05	Mizugama, Kadena, Okinawa, Japan	7	N 26°21'33", E 127°44'17"	54.4	38	PRJNA946699	SRR23916682	OQ843460
Parazoanthus swiftii	JDR170609-2-6	2017-06-09	Water Factory, Curacao	21	12°06'03“N, 68°57'01“W	23.3	40.1	PRJNA662982	SRR12626618	OQ785266
Parazoantus darwini	461	2007-03-01	Espanola, Galapagos, Equador	11	1°21'52"S 89°38'07"W	11.5	42.1	PRJNA662981	SRR12626557	OQ785268
Sphenopus marsupialis	291061	2019-06-07	off Nakijin, Okinawa, Japan		N 26°43′30”, E 127°56′47′′	24.6	39.5	PRJNA662993	SRR12626632	OQ759543
Umimayanthus chanpuru	62JR	2010-08-26	North Direction Island, Queensland, Australia	12	S 14°45′03″S,E 145°30′43″	22.3	33.3	PRJNA662702	SRR12620700	NA
Umimayanthus nakama	363JR	2006-09-13	Otsuki, Kochi, Japan	3	N 32°46′53″,E 132°40′09″	24.4	38.7	PRJNA645598	SRR12201158	OQ759542
Umimayanthus parasiticus	JDR170609-1-1	2017-06-09	Hilton, Curacao	31	12°07'14"N 68°58'12"W	25.6	41.9	PRJNA662764	SRR12621190	OQ785261
Zoanthus gigantus	JDR191205-1-2	2019-12-05	Mizugama, Kadena, Okinawa, Japan	15	N 26°21'49", E 127°46"21"	20.2	39.5	PRJNA598193	SRR11206404	OQ785260
Zoanthus pulchellus	JDR170613-9-56	2017-06-13	Director's Bay, Curacao	10	12°03'05“N, 68°51'03“W	20.2	37.5	PRJNA645596	SRR12201156	OQ759536
Zoanthus sociatus	170418-23	2017.04.18	Piuta Beach, Limon, Puerto Limon, Costa Rica	1	10°00'19.3"N 83°02'02.4"W	21.5	41.4	PRJNA598186	SRR11206569	OQ759538
Zoanthus solanderi	JDR170620-23-99	2017.06.20	Playa Jeremi, Curacao		12°19'45"N, 69°09'05"W	25.9	39.3	PRJNA662769	SRR12621302	OQ759539
Zoanthus sansibaricus	OKW21	2017.11.13	Adan Beach, Oku, Okinawa, Japan	3	26°49'21.8"N 128°18'45.9"E	20.1	42.3	PRJNA598188	SRR11206971	OQ759537
