# Supplementary material for: Genome sizes and repeatome evolution in zoantharians (Cnidaria: Hexacorallia: Zoantharia)
Source: PeerJ. 2023 Oct 16;11:e16188. doi: 10.7717/peerj.16188 (PMC10586311; doi:10.7717/peerj.16188)
Supplement: Supplemental Information 6 [file peerj-11-16188-s006.xlsx]

## Sheet: Table S2
Table S2: Additional informaiton on mitogenomes in this study.
Species	Reference	seed sequence Accession	Complete mtgenome (bp)
NC027667 Myriopathes japonica	Poliseno et al. 2020		17733
MN873591 Nanozoanthus harenaceus	Poliseno et al. 2020		18577
Epizoanthus rinbou	This study	MK953752.1	19386
Epizoanthus ramosus	This study	AB247349.1	19672
MN873588 Epizoanthus illoricatus	Poliseno et al. 2020		20447
NC018377 Stichopathes luetkeni	Poliseno et al. 2020		20448
Epizoanthus illoricatus	This study	MH013403	20449
Hydrozoanthus sils	This study	MK043065.1	20651
Hydrozanthus gracilis	This study	MH013403	20689
MN873589 Hydrozoanthus gracilis	Poliseno et al. 2020		20689
Antipathozoanthus remengesaui	This study	MG384655.1	20753
Hydrozoanthus antumbrosus	This study	MH013403	20763
Hydrozoanthus tunicans	This study	MH013403	20763
DQ825686 Savalia savaglia	Poliseno et al. 2020		20764
KY888673 - Palythoa heliodiscus	Chi & Johansen, 2017		20842
NC035578 Zoanthus sansibaricus	Poliseno et al. 2020		20972
MN873594 - Palythoa mizigama	Poliseno et al. 2020		21104
Antipathozoanthus obscurus	This study	MG384641.1	21105
Zoanthus pulchellus	This study	MH013403	21114
Zoanthus sociatus	This study	MH013403	21125
Zoanthus sansibaricus	This study	MH013403	21139
MN873599 Zoanthus cf. pulchellus	Poliseno et al. 2020		21139
MN873602 Zoanthus sp.	Poliseno et al. 2020		21140
MN873596 Parazoanthus elongatus	Poliseno et al. 2020		21148
MN873598 Sphenopus marsupialis	Poliseno et al. 2020		21199
MN873601 Zoanthus sociatus	Poliseno et al. 2020		21202
Sphenopus marsupialis	This study	MH013403	21217
Palythoa mizigama	This study	MH013403	21218
Palythoa grandiflora	This study	MH013403	21242
Palythoa mutuki	This study	MH013403	21244
Palythoa heliodiscus	This study	MH013403	21247
MN873593 - Palythoa heliodiscus	Poliseno et al. 2020		21262
MN873596 - Palythoa mutuki	Poliseno et al. 2020		21278
Zoanthus gigantus	This study	MH013403	21399
Zoanthus solanderi	This study	MH013403	21399
Parazoanthus darwini	This study	OQ785266	21419
MN873597 Parazoanthus swiftii	Poliseno et al. 2020		21499
Parazoanthus swiftii	This study	MH013403	21519
Bergia catenularis	This study	MH013403	21565
Bergia puertoricense	This study	MH013403	21577
MN873590 Microzoanthus occultus	Poliseno et al. 2020		21656
MN873592 Neozoanthus aff. uchina	Poliseno et al. 2020		21804
Epizoanthus scotinus	This study	HM042364.1	21875
Palythoa grandis	This study	OQ785267	22066
Umimayanthus nakama	This study	MH013403	22654
Palythoa carribaeorum	This study	OQ785267	23035
Palythoa tuberculosa	This study	OQ785265	23036
Umimayanthus parasiticus	This study	MH013403	23133
Epizoanthus planus	This study	MH013403	NA
Paleozoanthus reticulatus	This study	MH013403	NA
Umimayanthus chanpuru	This study	MH013403	NA
