# Supplementary material for: Genome sizes and repeatome evolution in zoantharians (Cnidaria: Hexacorallia: Zoantharia)
Source: PeerJ. 2023 Oct 16;11:e16188. doi: 10.7717/peerj.16188 (PMC10586311; doi:10.7717/peerj.16188)
Supplement: Supplemental Information 7 [file peerj-11-16188-s007.xlsx]

## Sheet: Feuil1
Table S3: Mitochondrial genomes from previous studies included in phylogenetic analyses.
Species	Museum Voucher	Sampling location	Accession	Reference
Palythoa heliodiscus	MISE MS160525-33	Dongsha, Taiwan	MN873593	Poliseno et al. (2020)
Palythoa heliodiscus	NA	Aquarium trade	KY888673	Chi & Johansen (2017)
Palythoa mutuki	MISE JDR160604-44	Dongsha, Taiwan	MN873595	Poliseno et al. (2020)
Palythoa mizigama	MISE201705MizugamaPmiz	Okinawa, Japan	MN873594	Poliseno et al. (2020)
Sphenopus marsupialis	MISE S8	Brunei	MN873598	Poliseno et al. (2020)
Zoanthus sansibaricus	NA	Okinawa, Japan	NC035578	Poliseno et al. (2020)
Zoanthus cf. sociatus	NA	Atlantic side, Panama	MN873600	Poliseno et al. (2020)
Zoanthus sociatus	MISE JDR150614-125	St Eustatius, The Netherlands	MN873601	Poliseno et al. (2020)
Zoanthus pulchellus	PAB-15-56	Atlantic side, Panama	MN873599	Poliseno et al. (2020)
Zoanthus sp.	PAN-23	Atlantic side, Panama	MN873602	Poliseno et al. (2020)
Epizoanthus illoricatus	MISE 140519	Okinawa, Japan	MN873588	Poliseno et al. (2020)
Parazoanthus swiftii	MISE JDR150614-118	St Eustatius, The Netherlands	MN873597	Poliseno et al. (2020)
Parazoanthus elongatus	MISE 170619	Chile	MN873596	Poliseno et al. (2020)
Hydrozoanthus gracilis	MISE JDR2016-hg1	Okinawa, Japan	MN873589	Poliseno et al. (2020)
Nanozoanthus harenaceus	MISE JDR201705Oura-nh1	Okinawa, Japan	MN873591	Poliseno et al. (2020)
Microzoanthus occultus	MISE JDR201705Oura-mo1	Okinawa, Japan	MN873590	Poliseno et al. (2020)
Neozoanthus aff. uchina	MISE JDR161218	Iriomote, Japan	MN873592	Poliseno et al. (2020)
Savalia savaglia	NA	Embiez Islands, France	DQ825686	Sinniger et al. (2007)
Stichopathes luetkeni	NA	NA	NC018377	Kayal et al. (2013)
Myriopathes japonica	NA	NA	NC027667	H.S. Kwak, E.H. Choi & U.W. Hwang, unpublished
