# Supplementary material for: Genome sizes and repeatome evolution in zoantharians (Cnidaria: Hexacorallia: Zoantharia)
Source: PeerJ. 2023 Oct 16;11:e16188. doi: 10.7717/peerj.16188 (PMC10586311; doi:10.7717/peerj.16188)
Supplement: Supplemental Information 8 [file peerj-11-16188-s008.xlsx]

## Sheet: Table S1
Table S4: L50 of dnaPipeTE assemblies of three species datasets, based on different coverage test runs.
Main scaffold L50	annoted.fasta	unannotated.fasta	Trinity.fasta
P.tuberculosa 0.1	1343	1121	1155
P.tuberculosa 0.2	1866	1107	1247
P.tuberculosa 0.25	2027	1114	1265
P.tuberculosa 0.3	2218	1124	1296
P.tuberculosa 0.4	2252	1132	1324
P.tuberculosa 0.5	2386	1111	1294
U. chanpuru 0.1	1098	1098	1098
U. chanpuru 0.2	1695	1065	1177
U. chanpuru 0.25	1843	1081	1208
U.chanpuru 0.3	2038	1109	1261
U. chanpuru 0.4
U.chanpuru 0.5	2234	1033	1223
H. tunicans 0.1	1691	1003	1065
H.tunicans 0.2	1784	946	1048
H. tunicans 0.25	2135	996	1157
H.tunicans 0.3	1858	953	1101
H.tunicans 0.4	2239	977	1167
H. tunicans 0.5	2078	983	1163
