# Supplementary material for: Genome sizes and repeatome evolution in zoantharians (Cnidaria: Hexacorallia: Zoantharia)
Source: PeerJ. 2023 Oct 16;11:e16188. doi: 10.7717/peerj.16188 (PMC10586311; doi:10.7717/peerj.16188)
Supplement: Supplemental Information 9 [file peerj-11-16188-s009.xlsx]

## Sheet: Table S3
Table S5: Genome sizes and percentages of heterozygosity in 18 species of zoantharians.							Homogenize LINEs etc
Species	Genome size (bp)	Heterozygosity level (%)					Check figure number
Antipathozoanthus remengesaui	570448367	2.38					Check Supplementary figures order
Bergia catenularis	539027897	1.3
Bergia puertoricense	527099053	1.12
Epizoanthus scotinus	483240802	0.88
Hydrozoanthus antumbrosus	372605502	0.39
Hydrozoanthus gracilis	420947975	2.3
Hydrozoanthus sils	503688136	0.69
Hydrozoanthus tunicans	371871877	0.42
Palythoa mizigama	286669957	2.19
Palythoa tuberculosa	678094403	2.07
Parazoanthus swiftii	429141723	0.81
Sphenopus marsupialis	404873572	3.43
Umimayanthus chanpuru	590537213	2.21
Umimayanthus nakama	436279583	0.98
Zoanthus gigantus	489283071	1.24
Zoanthus pulchellus	580597443	1.52
Zoanthus sociatus	553015412	2.51
Zoanthus solanderi	398695436	1.81
