# Supplementary material for: Genome sizes and repeatome evolution in zoantharians (Cnidaria: Hexacorallia: Zoantharia)
Source: PeerJ. 2023 Oct 16;11:e16188. doi: 10.7717/peerj.16188 (PMC10586311; doi:10.7717/peerj.16188)
Supplement: Supplemental Information 10 [file peerj-11-16188-s010.xlsx]

## Sheet: Table S4
Table S6: Abundance of repeat reads per class for each species according to dnaPipeTE analysis.
Species	LTR	LINE	SINE	DNA	MITE	Helitron	rRNA	Low complexity	Satellite	Tandem repeat	Simple repeat	Others	NA	Non RepDNA	Total	Total Transposable elements	Percentage transposable elements	Total repetitive DNA	Percentage repetitive DNA
Antipathozoanthus obscurus	251133	367228	11596	713409	0	0	148799	0	6728	0	2623	75852	4190659	76592732	82360759	1343366	1.63108	5768027	7.00337
Antipathozoanthus remengesaui	1817825	5099545	193218	3616990	0	1044	933037	0	24991	0	195525	934942	25706936	86510404	125034457	10728622	8.58053	38524053	30.8107
Bergia catenularis	1353563	6406482	344225	2573539	0	8786	1541596	0	29492	0	421658	319003	28107267	74853241	115958852	10686595	9.21585	41105611	35.4484
Bergia puertoricense	1006347	7709131	201113	2753727	0	8718	1023782	16333	16833	0	311769	307326	27848291	75786938	116990308	11679036	9.98291	41203370	35.2195
Epizoanthus iloricatus	1057043	3473670	177063	3073275	0	104098	343407	156932	26984	0	1205862	306251	31344727	74742446	116011758	7885149	6.79685	41269312	35.5734
Epizoanthus planus	713514	23028447	3695	1492379	0	17619	293678	83595	3001	0	454580	208746	18459128	81973856	126732238	25255654	19.9284	44758382	35.3173
Epizoanthus ramosus	883392	55353	96468	3465023	0	35047	1155603	0	810810	0	73709	793512	25140487	71126617	103636021	4535283	4.37616	32509404	31.3688
Epizoanthus rinbou	1739631	6811623	121586	2171374	0	2046	462445	0	313395	0	277524	755196	31549025	65125319	109329164	10846260	9.92074	44203845	40.4319
Epizoanthus scotinus	780848	9499299	123193	4769580	0	34576	530365	1955	230533	0	350445	632023	23735468	76052864	116741149	15207496	13.0267	40688285	34.8534
Hydrozoanthus antumbrosus	1073441	5491932	682345	2439559	0	80996	1560975	14408	311046	0	124436	491272	25404646	108815595	146490651	9768273	6.66819	37675056	25.7184
Hydrozoanthus gracilis	1447546	3350449	893624	2295013	0	60901	1774879	15030	78086	0	361096	382350	28865836	79313865	118838675	8047533	6.77181	39524810	33.2592
Hydrozoanthus sils	1691492	3684097	563985	2786067	0	83653	945619	0	320814	0	861139	570545	28125352	77448025	117080788	8809294	7.52412	39632763	33.8508
Hydrozoanthus tunicans	917182	5660161	859920	2443034	0	118748	1901400	150	450026	0	188887	412089	26502066	74211132	113664795	9999045	8.79696	39453663	34.7105
Paleozoanthus reticulatus	597351	2093524	134910	503606	0	226408	400702	1063	60424	0	6184	437086	23444709	88985484	116891451	3555799	3.04197	27905967	23.8734
Palythoa caribaeorum	2847298	6030662	898076	4789298	0	210264	560344	873	256312	0	131945	720970	27002759	84907271	128356072	14775598	11.5114	43448801	33.8502
Palythoa grandiflora	1204180	5053665	627903	3869989	0	164497	287718	2899	36815	0	149384	914670	26475579	75182904	113970203	10920234	9.58166	38787299	34.0328
Palythoa grandis	2188454	6176539	1078362	3638190	0	1019123	1318301	38924	71026	0	1355296	563788	22423280	75113720	114985003	14100668	12.263	39871283	34.6752
Palythoa heliodiscus	2240466	5547523	640115	2963905	0	1346981	981688	0	172846	0	126424	835894	24864179	76962148	116682169	12738990	10.9177	39720021	34.0412
Palythoa mizigama	1077114	2513408	793250	2605982	0	132464	266121	1888	85974	0	155871	219246	20219645	74996452	103067415	7122218	6.91025	28070963	27.2355
Palythoa mutuki	2317375	4423496	1028911	2919798	0	115555	815509	14493	212844	0	148828	537285	20069664	73307644	105911402	10805135	10.2021	32603758	30.784
Palythoa tuberculosa	2118646	7479724	1139415	5088371	0	117392	122353	0	164034	0	95220	1035546	32872184	70426530	120659415	15943548	13.2137	50232885	41.632
Parazoanthus darwinii	572227	3029429	162585	2545674	0	10055	1466842	2872	119467	0	49434	274081	17418647	69852273	95503586	6319970	6.61752	25651313	26.859
Parazoanthus swiftii	1106137	3405842	231114	3198944	0	2475	442543	1645	54675	0	303250	201461	20783024	73935700	103666810	7944512	7.66351	29731110	28.6795
Sphenopus marsupialis	2228483	3951960	2329648	5855884	0	227521	294381	5506	303026	0	966580	445749	21429810	82066095	120104643	14593496	12.1507	38038548	31.6712
Umimayanthus chanpuru	834156	5072933	45421	6818667	0	33301	688516	16954	58680	0	142270	193656	26521116	83815941	124241611	12804478	10.3061	40425670	32.5379
Umimayanthus nakama	590934	4528916	71051	6256106	0	114043	1202400	3139	34950	0	120089	212221	22190380	83317280	118641509	11561050	9.74452	35324229	29.7739
Umimayanthus parasiticus	2152601	6844553	225378	6258970	0	7925	1093929	6003	232936	0	345941	188475	19834980	76162325	113354016	15489427	13.6646	37191691	32.8102
Zoanthus gigantus	2334837	8221375	1390119	3832897	0	106149	107856	0	428066	0	122197	688271	21362794	75980821	114575382	15885377	13.8646	38594561	33.6849
Zoanthus pulchellus	1928326	11505313	1252992	4953755	0	458373	50855	5320	53206	0	89829	384707	25080235	68867125	114630036	20098759	17.5336	45762911	39.9223
Zoanthus sansibaricus	929328	7019592	569555	3100584	0	110752	147920	29022	290806	0	371799	361299	18327582	86738146	117996385	11729811	9.94082	31258239	26.4908
Zoanthus sociatus	1536089	9740039	827699	3048921	0	167514	118024	16631	131541	0	45872	307772	20856075	73430144	110226321	15320262	13.8989	36796177	33.3824
Zoanthus solanderi	2288752	8547656	1653821	3079044	0	117505	223815	256	197527	0	193112	705296	21462168	73525342	111994294	15686778	14.0068	38468952	34.349
																0.0360446
