# Supplementary material for: Genome sizes and repeatome evolution in zoantharians (Cnidaria: Hexacorallia: Zoantharia)
Source: PeerJ. 2023 Oct 16;11:e16188. doi: 10.7717/peerj.16188 (PMC10586311; doi:10.7717/peerj.16188)
Supplement: Supplemental Information 11 [file peerj-11-16188-s011.xlsx]

## Sheet: Table S5
Table S7: Number of TE copies per TE superfamily and the 18 zoantharian species.
TE superfamily	Species	Number of TE copies
DNA	Zoanthus pulchellus	562
DNA	Bergia catenularis	1019
DNA	Bergia puertoricense	1261
DNA	Umimayanthus nakama	1405
DNA	Zoanthus sociatus	1543
DNA	Zoanthus gigantus	2097
DNA	Hydrozoanthus antumbrosus	2170
DNA	Hydrozoanthus sils	2224
DNA	Hydrozoanthus gracilis	2305
DNA	Sphenopus marsupialis	2316
DNA	Epizoanthus scotinus	2367
DNA	Zoanthus solanderi	2462
DNA	Palythoa mizigama	2643
DNA	Parazoanthus swiftii	3043
DNA	Palythoa tuberculosa	3241
DNA	Hydrozoanthus tunicans	3433
DNA	Antipathozoanthus remengesaui	4765
DNA	Umimayanthus chanpuru	7623
DNA/Academ	Umimayanthus chanpuru	8
DNA/Academ	Bergia catenularis	11
DNA/Academ	Zoanthus sociatus	30
DNA/Academ	Sphenopus marsupialis	33
DNA/Academ	Zoanthus pulchellus	49
DNA/Academ	Parazoanthus swiftii	57
DNA/Academ	Zoanthus gigantus	88
DNA/Academ	Zoanthus solanderi	106
DNA/Academ	Epizoanthus scotinus	193
DNA/Academ-1	Bergia catenularis	3
DNA/Academ-1	Hydrozoanthus sils	34
DNA/Academ-1	Hydrozoanthus gracilis	79
DNA/Academ-1	Hydrozoanthus antumbrosus	82
DNA/Academ-1	Hydrozoanthus tunicans	93
DNA/Academ-1	Parazoanthus swiftii	125
DNA/Academ-1	Palythoa mizigama	145
DNA/Academ-1	Sphenopus marsupialis	370
DNA/Academ-1	Umimayanthus nakama	370
DNA/Academ-1	Umimayanthus chanpuru	436
DNA/Academ-1	Antipathozoanthus remengesaui	467
DNA/Academ-1	Zoanthus pulchellus	517
DNA/Academ-1	Epizoanthus scotinus	640
DNA/Academ-1	Zoanthus solanderi	950
DNA/Academ-1	Zoanthus sociatus	959
DNA/Academ-1	Palythoa tuberculosa	1007
DNA/Academ-1	Zoanthus gigantus	1070
DNA/Academ-2	Hydrozoanthus antumbrosus	9
DNA/Academ-2	Palythoa tuberculosa	30
DNA/Academ-2	Sphenopus marsupialis	31
DNA/Academ-2	Hydrozoanthus gracilis	67
DNA/Academ-2	Epizoanthus scotinus	92
DNA/Academ-2	Umimayanthus nakama	101
DNA/Academ-2	Zoanthus gigantus	131
DNA/Academ-2	Hydrozoanthus tunicans	132
DNA/Academ-2	Zoanthus pulchellus	159
DNA/Academ-2	Bergia puertoricense	166
DNA/Academ-2	Umimayanthus chanpuru	181
DNA/Academ-2	Zoanthus sociatus	181
DNA/Academ-2	Bergia catenularis	212
DNA/Academ-2	Zoanthus solanderi	428
DNA/Academ-2	Antipathozoanthus remengesaui	672
DNA/CMC-Chapaev	Epizoanthus scotinus	4
DNA/CMC-Chapaev	Sphenopus marsupialis	5
DNA/CMC-Chapaev	Antipathozoanthus remengesaui	9
DNA/CMC-Chapaev	Hydrozoanthus sils	13
DNA/CMC-Chapaev	Umimayanthus nakama	14
DNA/CMC-EnSpm	Zoanthus pulchellus	73
DNA/CMC-EnSpm	Hydrozoanthus gracilis	112
DNA/CMC-EnSpm	Palythoa mizigama	123
DNA/CMC-EnSpm	Antipathozoanthus remengesaui	140
DNA/CMC-EnSpm	Umimayanthus chanpuru	140
DNA/CMC-EnSpm	Bergia puertoricense	159
DNA/CMC-EnSpm	Bergia catenularis	174
DNA/CMC-EnSpm	Umimayanthus nakama	212
DNA/CMC-EnSpm	Hydrozoanthus antumbrosus	282
DNA/CMC-EnSpm	Hydrozoanthus sils	285
DNA/CMC-EnSpm	Parazoanthus swiftii	320
DNA/CMC-EnSpm	Palythoa tuberculosa	358
DNA/CMC-EnSpm	Hydrozoanthus tunicans	368
DNA/CMC-EnSpm	Epizoanthus scotinus	559
DNA/CMC-EnSpm	Zoanthus solanderi	579
DNA/CMC-EnSpm	Sphenopus marsupialis	697
DNA/CMC-EnSpm	Zoanthus gigantus	961
DNA/CMC-EnSpm	Zoanthus sociatus	2548
DNA/CMC-Transib	Palythoa mizigama	1
DNA/Crypton	Zoanthus solanderi	11
DNA/Crypton	Zoanthus gigantus	27
DNA/Crypton-A	Hydrozoanthus sils	9
DNA/Crypton-A	Epizoanthus scotinus	13
DNA/Crypton-A	Hydrozoanthus tunicans	158
DNA/Crypton-A	Zoanthus pulchellus	182
DNA/Crypton-A	Hydrozoanthus gracilis	184
DNA/Crypton-A	Hydrozoanthus antumbrosus	198
DNA/Crypton-A	Zoanthus sociatus	198
DNA/Crypton-A	Zoanthus solanderi	212
DNA/Crypton-A	Palythoa mizigama	254
DNA/Crypton-A	Zoanthus gigantus	379
DNA/Crypton-A	Palythoa tuberculosa	462
DNA/Crypton-A	Sphenopus marsupialis	480
DNA/Crypton-H	Umimayanthus chanpuru	17
DNA/Crypton-S	Hydrozoanthus antumbrosus	285
DNA/Crypton-V	Antipathozoanthus remengesaui	6
DNA/Crypton-V	Hydrozoanthus gracilis	12
DNA/Crypton-V	Palythoa mizigama	33
DNA/Crypton-V	Zoanthus gigantus	54
DNA/Crypton-V	Zoanthus solanderi	73
DNA/Crypton-V	Epizoanthus scotinus	170
DNA/Dada	Hydrozoanthus antumbrosus	7
DNA/Dada	Zoanthus solanderi	7
DNA/Dada	Sphenopus marsupialis	30
DNA/Ginger	Bergia catenularis	3
DNA/Ginger	Sphenopus marsupialis	9
DNA/Ginger	Antipathozoanthus remengesaui	15
DNA/Ginger	Umimayanthus chanpuru	19
DNA/Ginger	Zoanthus pulchellus	23
DNA/Ginger	Zoanthus sociatus	39
DNA/Ginger	Zoanthus solanderi	46
DNA/Ginger	Zoanthus gigantus	114
DNA/Ginger	Umimayanthus nakama	191
DNA/hAT	Epizoanthus scotinus	10
DNA/hAT	Sphenopus marsupialis	22
DNA/hAT	Umimayanthus nakama	45
DNA/hAT	Antipathozoanthus remengesaui	74
DNA/hAT	Palythoa mizigama	83
DNA/hAT	Palythoa tuberculosa	93
DNA/hAT	Hydrozoanthus antumbrosus	104
DNA/hAT	Umimayanthus chanpuru	121
DNA/hAT	Zoanthus sociatus	128
DNA/hAT	Zoanthus gigantus	168
DNA/hAT	Zoanthus solanderi	181
DNA/hAT?	Umimayanthus chanpuru	3
DNA/hAT?	Hydrozoanthus tunicans	6
DNA/hAT?	Palythoa tuberculosa	31
DNA/hAT?	Zoanthus pulchellus	31
DNA/hAT?	Zoanthus sociatus	55
DNA/hAT?	Sphenopus marsupialis	89
DNA/hAT?	Zoanthus solanderi	154
DNA/hAT?	Palythoa mizigama	292
DNA/hAT-Ac	Hydrozoanthus antumbrosus	10
DNA/hAT-Ac	Antipathozoanthus remengesaui	12
DNA/hAT-Ac	Hydrozoanthus tunicans	27
DNA/hAT-Ac	Zoanthus solanderi	35
DNA/hAT-Ac	Palythoa tuberculosa	37
DNA/hAT-Ac	Zoanthus sociatus	51
DNA/hAT-Ac	Bergia catenularis	64
DNA/hAT-Ac	Umimayanthus chanpuru	117
DNA/hAT-Ac	Zoanthus gigantus	146
DNA/hAT-Ac	Epizoanthus scotinus	169
DNA/hAT-Blackjack	Parazoanthus swiftii	34
DNA/hAT-Blackjack	Bergia puertoricense	46
DNA/hAT-Blackjack	Hydrozoanthus gracilis	75
DNA/hAT-Blackjack	Zoanthus gigantus	76
DNA/hAT-Blackjack	Antipathozoanthus remengesaui	89
DNA/hAT-Blackjack	Bergia catenularis	97
DNA/hAT-Blackjack	Hydrozoanthus antumbrosus	100
DNA/hAT-Blackjack	Zoanthus sociatus	103
DNA/hAT-Blackjack	Sphenopus marsupialis	119
DNA/hAT-Blackjack	Hydrozoanthus tunicans	151
DNA/hAT-Blackjack	Palythoa tuberculosa	152
DNA/hAT-Blackjack	Epizoanthus scotinus	196
DNA/hAT-Blackjack	Umimayanthus nakama	200
DNA/hAT-Blackjack	Zoanthus pulchellus	210
DNA/hAT-Blackjack	Zoanthus solanderi	217
DNA/hAT-Blackjack	Palythoa mizigama	244
DNA/hAT-Blackjack	Umimayanthus chanpuru	509
DNA/hAT-Charlie	Umimayanthus nakama	9
DNA/hAT-Charlie	Hydrozoanthus tunicans	15
DNA/hAT-Charlie	Zoanthus solanderi	24
DNA/hAT-Charlie	Bergia puertoricense	28
DNA/hAT-Charlie	Sphenopus marsupialis	32
DNA/hAT-Charlie	Palythoa tuberculosa	34
DNA/hAT-Charlie	Antipathozoanthus remengesaui	38
DNA/hAT-Charlie	Zoanthus gigantus	39
DNA/hAT-Charlie	Epizoanthus scotinus	49
DNA/hAT-Charlie	Hydrozoanthus gracilis	53
DNA/hAT-hAT1	Hydrozoanthus sils	34
DNA/hAT-hAT1	Palythoa mizigama	52
DNA/hAT-hAT1	Antipathozoanthus remengesaui	84
DNA/hAT-hAT1	Parazoanthus swiftii	203
DNA/hAT-hAT1	Umimayanthus chanpuru	210
DNA/hAT-hAT1	Hydrozoanthus antumbrosus	218
DNA/hAT-hAT1	Hydrozoanthus tunicans	218
DNA/hAT-hAT1	Sphenopus marsupialis	247
DNA/hAT-hAT1	Hydrozoanthus gracilis	251
DNA/hAT-hAT1	Bergia catenularis	314
DNA/hAT-hAT1	Zoanthus pulchellus	318
DNA/hAT-hAT1	Epizoanthus scotinus	333
DNA/hAT-hAT1	Zoanthus sociatus	340
DNA/hAT-hAT1	Umimayanthus nakama	398
DNA/hAT-hAT1	Bergia puertoricense	680
DNA/hAT-hAT1	Zoanthus gigantus	728
DNA/hAT-hAT1	Palythoa tuberculosa	763
DNA/hAT-hAT1	Zoanthus solanderi	959
DNA/hAT-hAT19	Hydrozoanthus antumbrosus	1
DNA/hAT-hAT19	Zoanthus sociatus	10
DNA/hAT-hAT5	Epizoanthus scotinus	233
DNA/hAT-hAT5	Bergia puertoricense	235
DNA/hAT-hAT5	Zoanthus sociatus	258
DNA/hAT-hAT5	Umimayanthus chanpuru	274
DNA/hAT-hAT5	Bergia catenularis	310
DNA/hAT-hAT5	Hydrozoanthus sils	358
DNA/hAT-hAT5	Hydrozoanthus gracilis	549
DNA/hAT-hAT5	Umimayanthus nakama	592
DNA/hAT-hAT5	Sphenopus marsupialis	600
DNA/hAT-hAT5	Zoanthus pulchellus	604
DNA/hAT-hAT5	Antipathozoanthus remengesaui	628
DNA/hAT-hAT5	Zoanthus solanderi	646
DNA/hAT-hAT5	Parazoanthus swiftii	711
DNA/hAT-hAT5	Zoanthus gigantus	849
DNA/hAT-hAT5	Hydrozoanthus antumbrosus	924
DNA/hAT-hAT5	Palythoa mizigama	1089
DNA/hAT-hAT5	Hydrozoanthus tunicans	1204
DNA/hAT-hAT5	Palythoa tuberculosa	2034
DNA/hAT-hAT6	Zoanthus pulchellus	11
DNA/hAT-hAT6	Bergia catenularis	21
DNA/hAT-hAT6	Parazoanthus swiftii	21
DNA/hAT-hAT6	Sphenopus marsupialis	49
DNA/hAT-hAT6	Umimayanthus chanpuru	104
DNA/hAT-hAT6	Palythoa tuberculosa	133
DNA/hAT-hATm	Palythoa tuberculosa	57
DNA/hAT-hATw	Sphenopus marsupialis	4
DNA/hAT-hATw	Antipathozoanthus remengesaui	9
DNA/hAT-hATw	Palythoa tuberculosa	12
DNA/hAT-hATw	Zoanthus sociatus	14
DNA/hAT-hATw	Zoanthus pulchellus	24
DNA/hAT-hATw	Zoanthus gigantus	34
DNA/hAT-Tag1	Parazoanthus swiftii	28
DNA/hAT-Tip100	Epizoanthus scotinus	394
DNA/hAT-Tip100	Bergia puertoricense	406
DNA/hAT-Tip100	Zoanthus solanderi	408
DNA/hAT-Tip100	Hydrozoanthus sils	519
DNA/hAT-Tip100	Hydrozoanthus tunicans	603
DNA/hAT-Tip100	Palythoa mizigama	621
DNA/hAT-Tip100	Sphenopus marsupialis	714
DNA/hAT-Tip100	Bergia catenularis	741
DNA/hAT-Tip100	Palythoa tuberculosa	1188
DNA/hAT-Tip100	Zoanthus pulchellus	1244
DNA/hAT-Tip100	Hydrozoanthus antumbrosus	1386
DNA/hAT-Tip100	Parazoanthus swiftii	1399
DNA/hAT-Tip100	Antipathozoanthus remengesaui	1684
DNA/hAT-Tip100	Hydrozoanthus gracilis	1710
DNA/hAT-Tip100	Umimayanthus chanpuru	2144
DNA/hAT-Tip100	Zoanthus gigantus	2170
DNA/hAT-Tip100	Umimayanthus nakama	2547
DNA/hAT-Tip100	Zoanthus sociatus	3207
DNA/IS3EU	Palythoa mizigama	9
DNA/IS3EU	Hydrozoanthus tunicans	16
DNA/IS3EU	Hydrozoanthus gracilis	30
DNA/IS3EU	Zoanthus sociatus	35
DNA/IS3EU	Hydrozoanthus sils	42
DNA/IS3EU	Hydrozoanthus antumbrosus	44
DNA/IS3EU	Bergia puertoricense	45
DNA/IS3EU	Bergia catenularis	48
DNA/IS3EU	Zoanthus gigantus	59
DNA/IS3EU	Parazoanthus swiftii	67
DNA/IS3EU	Zoanthus solanderi	69
DNA/IS3EU	Umimayanthus chanpuru	71
DNA/IS3EU	Zoanthus pulchellus	107
DNA/IS3EU	Epizoanthus scotinus	147
DNA/IS3EU	Umimayanthus nakama	161
DNA/IS3EU	Sphenopus marsupialis	165
DNA/IS3EU	Antipathozoanthus remengesaui	211
DNA/IS3EU	Palythoa tuberculosa	292
DNA/Kolobok-Hydra	Antipathozoanthus remengesaui	7
DNA/Kolobok-Hydra	Zoanthus sociatus	11
DNA/Kolobok-Hydra	Zoanthus solanderi	11
DNA/Kolobok-Hydra	Bergia puertoricense	12
DNA/Kolobok-Hydra	Hydrozoanthus sils	12
DNA/Kolobok-Hydra	Zoanthus pulchellus	14
DNA/Kolobok-Hydra	Hydrozoanthus tunicans	15
DNA/Kolobok-Hydra	Hydrozoanthus antumbrosus	19
DNA/Kolobok-Hydra	Bergia catenularis	26
DNA/Kolobok-Hydra	Sphenopus marsupialis	29
DNA/Kolobok-Hydra	Zoanthus gigantus	32
DNA/Kolobok-Hydra	Epizoanthus scotinus	82
DNA/Kolobok-T2	Hydrozoanthus antumbrosus	4
DNA/Kolobok-T2	Zoanthus sociatus	6
DNA/Kolobok-T2	Parazoanthus swiftii	11
DNA/Kolobok-T2	Hydrozoanthus gracilis	12
DNA/Kolobok-T2	Zoanthus gigantus	15
DNA/Kolobok-T2	Sphenopus marsupialis	18
DNA/Kolobok-T2	Bergia catenularis	19
DNA/Kolobok-T2	Zoanthus pulchellus	21
DNA/Kolobok-T2	Umimayanthus chanpuru	25
DNA/Kolobok-T2	Zoanthus solanderi	38
DNA/Kolobok-T2	Hydrozoanthus sils	39
DNA/Kolobok-T2	Palythoa tuberculosa	63
DNA/Kolobok-T2	Umimayanthus nakama	86
DNA/Kolobok-T2	Palythoa mizigama	92
DNA/Kolobok-T2	Epizoanthus scotinus	104
DNA/Maverick	Zoanthus sociatus	598
DNA/Maverick	Hydrozoanthus tunicans	1007
DNA/Maverick	Hydrozoanthus antumbrosus	1140
DNA/Maverick	Palythoa mizigama	1147
DNA/Maverick	Hydrozoanthus gracilis	1525
DNA/Maverick	Palythoa tuberculosa	1775
DNA/Maverick	Antipathozoanthus remengesaui	2102
DNA/Maverick	Epizoanthus scotinus	2578
DNA/Maverick	Parazoanthus swiftii	2686
DNA/Maverick	Hydrozoanthus sils	2822
DNA/Maverick	Zoanthus solanderi	3002
DNA/Maverick	Bergia puertoricense	3046
DNA/Maverick	Zoanthus gigantus	3370
DNA/Maverick	Bergia catenularis	3889
DNA/Maverick	Umimayanthus chanpuru	6706
DNA/Maverick	Umimayanthus nakama	9174
DNA/Maverick	Zoanthus pulchellus	16482
DNA/Maverick	Sphenopus marsupialis	19167
DNA/Merlin	Hydrozoanthus sils	3
DNA/Merlin	Bergia catenularis	7
DNA/Merlin	Palythoa mizigama	8
DNA/Merlin	Bergia puertoricense	9
DNA/Merlin	Umimayanthus nakama	13
DNA/Merlin	Zoanthus sociatus	14
DNA/Merlin	Hydrozoanthus antumbrosus	29
DNA/Merlin	Epizoanthus scotinus	36
DNA/Merlin	Hydrozoanthus tunicans	47
DNA/Merlin	Umimayanthus chanpuru	71
DNA/Merlin	Zoanthus solanderi	341
DNA/Merlin	Zoanthus gigantus	343
DNA/MULE-MuDR	Palythoa mizigama	12
DNA/MULE-MuDR	Umimayanthus nakama	14
DNA/MULE-MuDR	Antipathozoanthus remengesaui	17
DNA/MULE-MuDR	Bergia puertoricense	19
DNA/MULE-MuDR	Hydrozoanthus tunicans	41
DNA/MULE-MuDR	Bergia catenularis	51
DNA/MULE-MuDR	Zoanthus solanderi	52
DNA/MULE-MuDR	Zoanthus pulchellus	71
DNA/MULE-MuDR	Hydrozoanthus antumbrosus	93
DNA/MULE-MuDR	Zoanthus sociatus	101
DNA/MULE-MuDR	Hydrozoanthus gracilis	112
DNA/MULE-MuDR	Epizoanthus scotinus	118
DNA/MULE-MuDR	Zoanthus gigantus	191
DNA/MULE-MuDR	Palythoa tuberculosa	233
DNA/MULE-MuDR	Parazoanthus swiftii	257
DNA/MULE-MuDR	Hydrozoanthus sils	334
DNA/MULE-MuDR?	Hydrozoanthus sils	9
DNA/MULE-NOF	Zoanthus solanderi	3
DNA/MULE-NOF	Palythoa tuberculosa	8
DNA/P	Zoanthus solanderi	2
DNA/P	Hydrozoanthus tunicans	3
DNA/P	Zoanthus sociatus	15
DNA/P	Sphenopus marsupialis	30
DNA/P	Bergia catenularis	33
DNA/P	Epizoanthus scotinus	34
DNA/P	Bergia puertoricense	58
DNA/PIF-Harbinger	Hydrozoanthus sils	462
DNA/PIF-Harbinger	Hydrozoanthus tunicans	645
DNA/PIF-Harbinger	Bergia catenularis	909
DNA/PIF-Harbinger	Zoanthus pulchellus	992
DNA/PIF-Harbinger	Bergia puertoricense	1116
DNA/PIF-Harbinger	Epizoanthus scotinus	1150
DNA/PIF-Harbinger	Zoanthus sociatus	1154
DNA/PIF-Harbinger	Hydrozoanthus antumbrosus	1238
DNA/PIF-Harbinger	Hydrozoanthus gracilis	1442
DNA/PIF-Harbinger	Palythoa mizigama	1562
DNA/PIF-Harbinger	Parazoanthus swiftii	1575
DNA/PIF-Harbinger	Zoanthus gigantus	1658
DNA/PIF-Harbinger	Palythoa tuberculosa	1673
DNA/PIF-Harbinger	Zoanthus solanderi	1722
DNA/PIF-Harbinger	Sphenopus marsupialis	1867
DNA/PIF-Harbinger	Umimayanthus nakama	2029
DNA/PIF-Harbinger	Antipathozoanthus remengesaui	2102
DNA/PIF-Harbinger	Umimayanthus chanpuru	2662
DNA/PIF-ISL2EU	Palythoa mizigama	20
DNA/PIF-ISL2EU	Parazoanthus swiftii	37
DNA/PIF-ISL2EU	Bergia catenularis	64
DNA/PIF-ISL2EU	Sphenopus marsupialis	67
DNA/PIF-ISL2EU	Zoanthus gigantus	72
DNA/PIF-ISL2EU	Hydrozoanthus gracilis	91
DNA/PIF-ISL2EU	Zoanthus solanderi	97
DNA/PIF-ISL2EU	Zoanthus sociatus	111
DNA/PIF-ISL2EU	Bergia puertoricense	115
DNA/PIF-ISL2EU	Umimayanthus nakama	118
DNA/PIF-ISL2EU	Hydrozoanthus antumbrosus	140
DNA/PIF-ISL2EU	Antipathozoanthus remengesaui	187
DNA/PIF-ISL2EU	Umimayanthus chanpuru	188
DNA/PIF-ISL2EU	Hydrozoanthus sils	189
DNA/PIF-ISL2EU	Zoanthus pulchellus	215
DNA/PIF-ISL2EU	Hydrozoanthus tunicans	266
DNA/PIF-ISL2EU	Epizoanthus scotinus	322
DNA/PIF-ISL2EU	Palythoa tuberculosa	336
DNA/PIF-Spy	Bergia catenularis	1
DNA/PiggyBac	Zoanthus sociatus	6
DNA/PiggyBac	Zoanthus gigantus	11
DNA/PiggyBac	Hydrozoanthus antumbrosus	51
DNA/PiggyBac	Palythoa mizigama	63
DNA/PiggyBac	Zoanthus solanderi	78
DNA/PiggyBac	Hydrozoanthus sils	155
DNA/PiggyBac	Hydrozoanthus tunicans	155
DNA/PiggyBac	Zoanthus pulchellus	179
DNA/PiggyBac	Sphenopus marsupialis	199
DNA/PiggyBac	Hydrozoanthus gracilis	231
DNA/PiggyBac	Palythoa tuberculosa	402
DNA/PiggyBac	Parazoanthus swiftii	471
DNA/PiggyBac	Antipathozoanthus remengesaui	1064
DNA/PiggyBac	Bergia puertoricense	1228
DNA/PiggyBac	Bergia catenularis	1462
DNA/PiggyBac	Umimayanthus nakama	1842
DNA/PiggyBac	Umimayanthus chanpuru	2967
DNA/Sola	Zoanthus gigantus	6
DNA/Sola	Zoanthus pulchellus	16
DNA/Sola	Hydrozoanthus gracilis	26
DNA/Sola	Sphenopus marsupialis	42
DNA/Sola	Umimayanthus chanpuru	61
DNA/Sola	Parazoanthus swiftii	121
DNA/Sola-1	Zoanthus solanderi	38
DNA/Sola-1	Zoanthus gigantus	77
DNA/Sola-2	Palythoa mizigama	8
DNA/Sola-2	Antipathozoanthus remengesaui	10
DNA/Sola-2	Hydrozoanthus gracilis	12
DNA/Sola-2	Zoanthus pulchellus	15
DNA/Sola-2	Zoanthus solanderi	16
DNA/Sola-2	Umimayanthus nakama	19
DNA/Sola-2	Zoanthus sociatus	21
DNA/Sola-2	Umimayanthus chanpuru	24
DNA/Sola-2	Zoanthus gigantus	33
DNA/Sola-2	Palythoa tuberculosa	42
DNA/Sola-2	Epizoanthus scotinus	49
DNA/Sola-2	Bergia catenularis	54
DNA/Sola-2	Bergia puertoricense	57
DNA/Sola-2	Hydrozoanthus antumbrosus	72
DNA/Sola-2	Sphenopus marsupialis	81
DNA/Sola-3	Palythoa mizigama	80
DNA/Sola-3	Hydrozoanthus sils	95
DNA/Sola-3	Zoanthus solanderi	96
DNA/Sola-3	Zoanthus pulchellus	116
DNA/Sola-3	Hydrozoanthus tunicans	127
DNA/Sola-3	Hydrozoanthus antumbrosus	128
DNA/Sola-3	Sphenopus marsupialis	171
DNA/Sola-3	Umimayanthus chanpuru	182
DNA/Sola-3	Palythoa tuberculosa	230
DNA/Sola-3	Epizoanthus scotinus	289
DNA/Sola-3	Bergia catenularis	298
DNA/Sola-3	Hydrozoanthus gracilis	311
DNA/Sola-3	Zoanthus gigantus	339
DNA/Sola-3	Bergia puertoricense	475
DNA/Sola-3	Antipathozoanthus remengesaui	491
DNA/Sola-3	Zoanthus sociatus	520
DNA/Sola-3	Parazoanthus swiftii	727
DNA/Sola-3	Umimayanthus nakama	869
DNA/TcMar	Hydrozoanthus gracilis	32
DNA/TcMar	Sphenopus marsupialis	32
DNA/TcMar	Palythoa mizigama	64
DNA/TcMar	Umimayanthus chanpuru	73
DNA/TcMar	Zoanthus pulchellus	75
DNA/TcMar	Palythoa tuberculosa	91
DNA/TcMar	Parazoanthus swiftii	94
DNA/TcMar	Zoanthus sociatus	99
DNA/TcMar	Bergia catenularis	105
DNA/TcMar	Hydrozoanthus sils	119
DNA/TcMar	Bergia puertoricense	122
DNA/TcMar	Hydrozoanthus tunicans	151
DNA/TcMar	Epizoanthus scotinus	198
DNA/TcMar	Hydrozoanthus antumbrosus	288
DNA/TcMar-Fot1	Hydrozoanthus gracilis	2
DNA/TcMar-Fot1	Zoanthus solanderi	7
DNA/TcMar-Fot1	Sphenopus marsupialis	15
DNA/TcMar-ISRm11	Palythoa mizigama	40
DNA/TcMar-ISRm11	Umimayanthus chanpuru	46
DNA/TcMar-ISRm11	Hydrozoanthus antumbrosus	70
DNA/TcMar-ISRm11	Zoanthus pulchellus	86
DNA/TcMar-ISRm11	Hydrozoanthus tunicans	131
DNA/TcMar-ISRm11	Hydrozoanthus gracilis	153
DNA/TcMar-ISRm11	Sphenopus marsupialis	170
DNA/TcMar-ISRm11	Zoanthus sociatus	171
DNA/TcMar-ISRm11	Hydrozoanthus sils	173
DNA/TcMar-ISRm11	Zoanthus solanderi	184
DNA/TcMar-ISRm11	Zoanthus gigantus	246
DNA/TcMar-ISRm11	Palythoa tuberculosa	292
DNA/TcMar-ISRm11	Umimayanthus nakama	347
DNA/TcMar-ISRm11	Epizoanthus scotinus	1236
DNA/TcMar-Mariner	Zoanthus sociatus	2
DNA/TcMar-Pogo	Zoanthus gigantus	29
DNA/TcMar-Pogo	Zoanthus solanderi	63
DNA/TcMar-Pogo	Palythoa tuberculosa	101
DNA/TcMar-Pogo	Antipathozoanthus remengesaui	171
DNA/TcMar-Pogo	Parazoanthus swiftii	232
DNA/TcMar-Pogo	Epizoanthus scotinus	238
DNA/TcMar-Pogo	Sphenopus marsupialis	241
DNA/TcMar-Pogo	Hydrozoanthus gracilis	243
DNA/TcMar-Pogo	Zoanthus sociatus	253
DNA/TcMar-Pogo	Hydrozoanthus tunicans	279
DNA/TcMar-Pogo	Umimayanthus nakama	303
DNA/TcMar-Pogo	Umimayanthus chanpuru	304
DNA/TcMar-Pogo	Hydrozoanthus antumbrosus	369
DNA/TcMar-Pogo	Bergia catenularis	507
DNA/TcMar-Pogo	Bergia puertoricense	767
DNA/TcMar-Pogo	Palythoa mizigama	844
DNA/TcMar-Tc1	Palythoa tuberculosa	1
DNA/TcMar-Tc1	Bergia puertoricense	4
DNA/TcMar-Tc1	Zoanthus pulchellus	16
DNA/TcMar-Tc1	Zoanthus gigantus	35
DNA/TcMar-Tc1	Zoanthus solanderi	61
DNA/TcMar-Tc1	Zoanthus sociatus	137
DNA/TcMar-Tc2	Hydrozoanthus sils	277
DNA/TcMar-Tc2	Hydrozoanthus antumbrosus	351
DNA/TcMar-Tc2	Sphenopus marsupialis	417
DNA/TcMar-Tc2	Palythoa mizigama	576
DNA/TcMar-Tc2	Parazoanthus swiftii	643
DNA/TcMar-Tc2	Antipathozoanthus remengesaui	674
DNA/TcMar-Tc2	Hydrozoanthus gracilis	686
DNA/TcMar-Tc2	Zoanthus solanderi	713
DNA/TcMar-Tc2	Zoanthus pulchellus	894
DNA/TcMar-Tc2	Zoanthus sociatus	1090
DNA/TcMar-Tc2	Hydrozoanthus tunicans	1126
DNA/TcMar-Tc2	Bergia catenularis	1132
DNA/TcMar-Tc2	Bergia puertoricense	1152
DNA/TcMar-Tc2	Zoanthus gigantus	1243
DNA/TcMar-Tc2	Epizoanthus scotinus	1501
DNA/TcMar-Tc2	Umimayanthus nakama	3135
DNA/TcMar-Tc2	Umimayanthus chanpuru	4626
DNA/TcMar-Tc2	Palythoa tuberculosa	7848
DNA/TcMar-Tigger	Zoanthus gigantus	33
DNA/TcMar-Tigger	Zoanthus sociatus	49
DNA/TcMar-Tigger	Sphenopus marsupialis	51
DNA/TcMar-Tigger	Epizoanthus scotinus	64
DNA/TcMar-Tigger	Bergia catenularis	123
DNA/TcMar-Tigger	Antipathozoanthus remengesaui	127
DNA/TcMar-Tigger	Bergia puertoricense	136
DNA/TcMar-Tigger	Umimayanthus nakama	143
DNA/TcMar-Tigger	Parazoanthus swiftii	144
DNA/TcMar-Tigger	Hydrozoanthus gracilis	167
DNA/TcMar-Tigger	Palythoa tuberculosa	349
DNA/TcMar-Tigger	Palythoa mizigama	361
DNA/TcMar-Tigger	Umimayanthus chanpuru	457
DNA/TcMar-Tigger	Hydrozoanthus tunicans	658
DNA/TcMar-Tigger	Hydrozoanthus antumbrosus	675
DNA/Zator	Umimayanthus chanpuru	1
DNA/Zator	Hydrozoanthus gracilis	5
DNA/Zator	Zoanthus sociatus	6
DNA/Zator	Bergia catenularis	10
DNA/Zator	Parazoanthus swiftii	11
DNA/Zator	Sphenopus marsupialis	22
DNA/Zator	Hydrozoanthus sils	27
DNA/Zator	Zoanthus gigantus	51
DNA/Zator	Umimayanthus nakama	53
DNA/Zator	Epizoanthus scotinus	74
DNA/Zator	Palythoa tuberculosa	101
DNA/Zisupton	Umimayanthus nakama	8
DNA/Zisupton	Zoanthus gigantus	12
DNA/Zisupton	Hydrozoanthus sils	89
LINE/CR1	Palythoa mizigama	452
LINE/CR1	Sphenopus marsupialis	725
LINE/CR1	Parazoanthus swiftii	897
LINE/CR1	Hydrozoanthus gracilis	967
LINE/CR1	Hydrozoanthus sils	994
LINE/CR1	Zoanthus sociatus	1258
LINE/CR1	Zoanthus pulchellus	1314
LINE/CR1	Palythoa tuberculosa	1397
LINE/CR1	Umimayanthus chanpuru	1890
LINE/CR1	Bergia catenularis	1996
LINE/CR1	Epizoanthus scotinus	2010
LINE/CR1	Hydrozoanthus tunicans	2136
LINE/CR1	Hydrozoanthus antumbrosus	2207
LINE/CR1	Bergia puertoricense	2270
LINE/CR1	Zoanthus solanderi	2720
LINE/CR1	Umimayanthus nakama	2756
LINE/CR1	Zoanthus gigantus	2758
LINE/CR1	Antipathozoanthus remengesaui	3010
LINE/CR1-Zenon	Antipathozoanthus remengesaui	5
LINE/CR1-Zenon	Sphenopus marsupialis	7
LINE/CR1-Zenon	Umimayanthus nakama	12
LINE/CR1-Zenon	Zoanthus gigantus	17
LINE/CR1-Zenon	Bergia catenularis	25
LINE/CR1-Zenon	Bergia puertoricense	36
LINE/CR1-Zenon	Zoanthus pulchellus	44
LINE/CR1-Zenon	Umimayanthus chanpuru	79
LINE/CR1-Zenon	Zoanthus solanderi	85
LINE/CRE	Palythoa mizigama	150
LINE/CRE	Epizoanthus scotinus	268
LINE/CRE	Hydrozoanthus gracilis	345
LINE/CRE	Hydrozoanthus sils	357
LINE/CRE	Sphenopus marsupialis	476
LINE/CRE	Bergia catenularis	698
LINE/CRE	Zoanthus pulchellus	712
LINE/CRE	Umimayanthus nakama	726
LINE/CRE	Bergia puertoricense	783
LINE/CRE	Hydrozoanthus antumbrosus	835
LINE/CRE	Palythoa tuberculosa	855
LINE/CRE	Parazoanthus swiftii	903
LINE/CRE	Zoanthus sociatus	958
LINE/CRE	Hydrozoanthus tunicans	966
LINE/CRE	Umimayanthus chanpuru	1041
LINE/CRE	Antipathozoanthus remengesaui	1341
LINE/CRE	Zoanthus gigantus	1622
LINE/CRE	Zoanthus solanderi	1652
LINE/Dong-R4	Bergia catenularis	13
LINE/Dong-R4	Hydrozoanthus sils	128
LINE/Dong-R4	Umimayanthus nakama	144
LINE/Dong-R4	Hydrozoanthus gracilis	217
LINE/Dong-R4	Parazoanthus swiftii	246
LINE/Dong-R4	Palythoa mizigama	258
LINE/Dong-R4	Umimayanthus chanpuru	329
LINE/Dong-R4	Sphenopus marsupialis	492
LINE/Dong-R4	Hydrozoanthus tunicans	537
LINE/Dong-R4	Hydrozoanthus antumbrosus	546
LINE/Dong-R4	Zoanthus pulchellus	719
LINE/Dong-R4	Palythoa tuberculosa	832
LINE/Dong-R4	Zoanthus sociatus	1018
LINE/Dong-R4	Zoanthus gigantus	1339
LINE/Dong-R4	Zoanthus solanderi	1345
LINE/I	Hydrozoanthus sils	6
LINE/I	Bergia catenularis	33
LINE/I	Bergia puertoricense	68
LINE/I-Jockey	Epizoanthus scotinus	7
LINE/I-Jockey	Parazoanthus swiftii	7
LINE/I-Jockey	Umimayanthus nakama	7
LINE/I-Jockey	Hydrozoanthus sils	11
LINE/I-Jockey	Antipathozoanthus remengesaui	13
LINE/I-Jockey	Zoanthus sociatus	16
LINE/I-Jockey	Zoanthus solanderi	18
LINE/I-Jockey	Bergia catenularis	20
LINE/I-Jockey	Palythoa mizigama	20
LINE/I-Jockey	Bergia puertoricense	29
LINE/I-Jockey	Sphenopus marsupialis	33
LINE/I-Jockey	Hydrozoanthus tunicans	37
LINE/I-Jockey	Palythoa tuberculosa	98
LINE/I-Jockey	Zoanthus gigantus	148
LINE/L1	Umimayanthus chanpuru	12
LINE/L1	Hydrozoanthus gracilis	19
LINE/L1	Sphenopus marsupialis	31
LINE/L1	Umimayanthus nakama	33
LINE/L1	Palythoa mizigama	35
LINE/L1	Zoanthus gigantus	57
LINE/L1	Zoanthus pulchellus	63
LINE/L1	Bergia catenularis	96
LINE/L1	Parazoanthus swiftii	143
LINE/L1	Hydrozoanthus tunicans	165
LINE/L1	Bergia puertoricense	168
LINE/L1	Antipathozoanthus remengesaui	175
LINE/L1	Hydrozoanthus antumbrosus	202
LINE/L1	Palythoa tuberculosa	250
LINE/L1	Zoanthus sociatus	259
LINE/L1	Epizoanthus scotinus	1638
LINE/L1	Zoanthus solanderi	1833
LINE/L1	Hydrozoanthus sils	2978
LINE/L1-Tx1	Hydrozoanthus sils	125
LINE/L1-Tx1	Hydrozoanthus antumbrosus	151
LINE/L1-Tx1	Hydrozoanthus gracilis	154
LINE/L1-Tx1	Hydrozoanthus tunicans	173
LINE/L1-Tx1	Zoanthus solanderi	279
LINE/L1-Tx1	Zoanthus gigantus	283
LINE/L1-Tx1	Zoanthus pulchellus	301
LINE/L1-Tx1	Zoanthus sociatus	404
LINE/L1-Tx1	Epizoanthus scotinus	407
LINE/L1-Tx1	Parazoanthus swiftii	504
LINE/L1-Tx1	Sphenopus marsupialis	582
LINE/L1-Tx1	Bergia catenularis	609
LINE/L1-Tx1	Antipathozoanthus remengesaui	668
LINE/L1-Tx1	Bergia puertoricense	722
LINE/L1-Tx1	Palythoa mizigama	851
LINE/L1-Tx1	Palythoa tuberculosa	1547
LINE/L1-Tx1	Umimayanthus chanpuru	2186
LINE/L1-Tx1	Umimayanthus nakama	2729
LINE/L2	Palythoa mizigama	3185
LINE/L2	Hydrozoanthus sils	5254
LINE/L2	Hydrozoanthus gracilis	5498
LINE/L2	Hydrozoanthus antumbrosus	7132
LINE/L2	Zoanthus sociatus	7789
LINE/L2	Hydrozoanthus tunicans	7943
LINE/L2	Sphenopus marsupialis	8287
LINE/L2	Parazoanthus swiftii	9894
LINE/L2	Umimayanthus nakama	10140
LINE/L2	Bergia puertoricense	11769
LINE/L2	Bergia catenularis	11982
LINE/L2	Umimayanthus chanpuru	11996
LINE/L2	Antipathozoanthus remengesaui	12171
LINE/L2	Zoanthus solanderi	14976
LINE/L2	Palythoa tuberculosa	15039
LINE/L2	Zoanthus pulchellus	16587
LINE/L2	Zoanthus gigantus	16605
LINE/L2	Epizoanthus scotinus	18345
LINE/Penelope	Umimayanthus nakama	2803
LINE/Penelope	Parazoanthus swiftii	3029
LINE/Penelope	Palythoa mizigama	3180
LINE/Penelope	Sphenopus marsupialis	3559
LINE/Penelope	Epizoanthus scotinus	3650
LINE/Penelope	Hydrozoanthus tunicans	3830
LINE/Penelope	Hydrozoanthus gracilis	4229
LINE/Penelope	Bergia catenularis	4417
LINE/Penelope	Bergia puertoricense	4530
LINE/Penelope	Umimayanthus chanpuru	5846
LINE/Penelope	Hydrozoanthus sils	6568
LINE/Penelope	Zoanthus sociatus	7686
LINE/Penelope	Antipathozoanthus remengesaui	8359
LINE/Penelope	Hydrozoanthus antumbrosus	8774
LINE/Penelope	Zoanthus solanderi	8785
LINE/Penelope	Zoanthus pulchellus	9378
LINE/Penelope	Palythoa tuberculosa	9767
LINE/Penelope	Zoanthus gigantus	10453
LINE/R1	Hydrozoanthus antumbrosus	15
LINE/R1	Parazoanthus swiftii	32
LINE/R1	Hydrozoanthus tunicans	33
LINE/R1	Hydrozoanthus gracilis	75
LINE/R1	Umimayanthus nakama	331
LINE/R1	Umimayanthus chanpuru	698
LINE/R2	Hydrozoanthus antumbrosus	2
LINE/R2	Hydrozoanthus tunicans	5
LINE/R2	Bergia catenularis	14
LINE/R2	Hydrozoanthus gracilis	25
LINE/R2-Hero	Umimayanthus nakama	5
LINE/R2-Hero	Bergia catenularis	10
LINE/R2-Hero	Zoanthus pulchellus	38
LINE/R2-Hero	Palythoa mizigama	61
LINE/R2-Hero	Zoanthus solanderi	114
LINE/R2-Hero	Zoanthus sociatus	158
LINE/R2-Hero	Zoanthus gigantus	361
LINE/R2-Hero	Palythoa tuberculosa	389
LINE/R2-NeSL	Hydrozoanthus tunicans	2
LINE/R2-NeSL	Epizoanthus scotinus	10
LINE/R2-NeSL	Zoanthus gigantus	20
LINE/R2-NeSL	Bergia catenularis	39
LINE/Rex-Babar	Palythoa mizigama	304
LINE/Rex-Babar	Sphenopus marsupialis	467
LINE/Rex-Babar	Hydrozoanthus gracilis	582
LINE/Rex-Babar	Hydrozoanthus sils	748
LINE/Rex-Babar	Epizoanthus scotinus	805
LINE/Rex-Babar	Zoanthus sociatus	997
LINE/Rex-Babar	Parazoanthus swiftii	1025
LINE/Rex-Babar	Hydrozoanthus antumbrosus	1097
LINE/Rex-Babar	Hydrozoanthus tunicans	1257
LINE/Rex-Babar	Palythoa tuberculosa	1273
LINE/Rex-Babar	Zoanthus pulchellus	1383
LINE/Rex-Babar	Antipathozoanthus remengesaui	1477
LINE/Rex-Babar	Umimayanthus chanpuru	1483
LINE/Rex-Babar	Bergia catenularis	1752
LINE/Rex-Babar	Bergia puertoricense	2278
LINE/Rex-Babar	Zoanthus gigantus	2330
LINE/Rex-Babar	Umimayanthus nakama	2439
LINE/Rex-Babar	Zoanthus solanderi	2504
LINE/RTE-BovB	Epizoanthus scotinus	487
LINE/RTE-BovB	Antipathozoanthus remengesaui	1121
LINE/RTE-BovB	Hydrozoanthus gracilis	1310
LINE/RTE-BovB	Hydrozoanthus sils	1403
LINE/RTE-BovB	Hydrozoanthus antumbrosus	1496
LINE/RTE-BovB	Hydrozoanthus tunicans	1568
LINE/RTE-BovB	Parazoanthus swiftii	1830
LINE/RTE-BovB	Bergia puertoricense	2513
LINE/RTE-BovB	Bergia catenularis	2516
LINE/RTE-BovB	Umimayanthus nakama	3130
LINE/RTE-BovB	Umimayanthus chanpuru	3141
LINE/RTE-BovB	Palythoa mizigama	3228
LINE/RTE-BovB	Palythoa tuberculosa	3720
LINE/RTE-BovB	Sphenopus marsupialis	4077
LINE/RTE-BovB	Zoanthus pulchellus	7137
LINE/RTE-BovB	Zoanthus sociatus	7163
LINE/RTE-BovB	Zoanthus gigantus	13129
LINE/RTE-BovB	Zoanthus solanderi	16575
LINE/RTE-ORTE	Umimayanthus chanpuru	41
LINE/RTE-X	Hydrozoanthus sils	670
LINE/RTE-X	Zoanthus sociatus	689
LINE/RTE-X	Zoanthus solanderi	734
LINE/RTE-X	Palythoa mizigama	909
LINE/RTE-X	Zoanthus gigantus	1079
LINE/RTE-X	Umimayanthus nakama	1145
LINE/RTE-X	Zoanthus pulchellus	1184
LINE/RTE-X	Hydrozoanthus gracilis	1259
LINE/RTE-X	Sphenopus marsupialis	1315
LINE/RTE-X	Hydrozoanthus tunicans	1756
LINE/RTE-X	Bergia catenularis	1859
LINE/RTE-X	Antipathozoanthus remengesaui	1867
LINE/RTE-X	Parazoanthus swiftii	1891
LINE/RTE-X	Hydrozoanthus antumbrosus	2212
LINE/RTE-X	Umimayanthus chanpuru	2503
LINE/RTE-X	Bergia puertoricense	2591
LINE/RTE-X	Epizoanthus scotinus	2789
LINE/RTE-X	Palythoa tuberculosa	2963
LINE/Tad1	Zoanthus pulchellus	7
LINE/Tad1	Epizoanthus scotinus	18
LTR	Epizoanthus scotinus	9
LTR/Copia	Hydrozoanthus tunicans	4
LTR/Copia	Palythoa mizigama	30
LTR/Copia	Hydrozoanthus gracilis	37
LTR/Copia	Hydrozoanthus antumbrosus	63
LTR/Copia	Palythoa tuberculosa	90
LTR/Copia	Epizoanthus scotinus	105
LTR/Copia	Bergia puertoricense	137
LTR/Copia	Umimayanthus nakama	170
LTR/Copia	Antipathozoanthus remengesaui	182
LTR/Copia	Zoanthus solanderi	189
LTR/Copia	Zoanthus gigantus	219
LTR/Copia	Sphenopus marsupialis	240
LTR/Copia	Hydrozoanthus sils	300
LTR/Copia	Parazoanthus swiftii	306
LTR/Copia	Bergia catenularis	344
LTR/Copia	Zoanthus sociatus	394
LTR/Copia	Zoanthus pulchellus	1390
LTR/DIRS	Epizoanthus scotinus	75
LTR/DIRS	Parazoanthus swiftii	83
LTR/DIRS	Bergia puertoricense	84
LTR/DIRS	Umimayanthus nakama	89
LTR/DIRS	Umimayanthus chanpuru	91
LTR/DIRS	Bergia catenularis	115
LTR/DIRS	Palythoa mizigama	117
LTR/DIRS	Palythoa tuberculosa	176
LTR/DIRS	Zoanthus solanderi	229
LTR/DIRS	Zoanthus sociatus	298
LTR/DIRS	Zoanthus gigantus	367
LTR/DIRS	Hydrozoanthus tunicans	375
LTR/DIRS	Hydrozoanthus antumbrosus	394
LTR/DIRS	Hydrozoanthus sils	454
LTR/DIRS	Antipathozoanthus remengesaui	548
LTR/DIRS	Hydrozoanthus gracilis	650
LTR/DIRS	Sphenopus marsupialis	729
LTR/DIRS	Zoanthus pulchellus	735
LTR/ERV1	Palythoa tuberculosa	1
LTR/ERV1	Zoanthus gigantus	15
LTR/ERV1	Hydrozoanthus sils	18
LTR/ERV1	Epizoanthus scotinus	24
LTR/ERV1	Hydrozoanthus antumbrosus	37
LTR/ERV1	Zoanthus solanderi	38
LTR/ERV1	Parazoanthus swiftii	52
LTR/ERVK	Epizoanthus scotinus	78
LTR/ERVK	Zoanthus solanderi	147
LTR/ERVK	Hydrozoanthus sils	385
LTR/Gypsy	Epizoanthus scotinus	1473
LTR/Gypsy	Bergia catenularis	1857
LTR/Gypsy	Bergia puertoricense	1900
LTR/Gypsy	Umimayanthus nakama	2088
LTR/Gypsy	Parazoanthus swiftii	2108
LTR/Gypsy	Umimayanthus chanpuru	2716
LTR/Gypsy	Hydrozoanthus antumbrosus	2837
LTR/Gypsy	Hydrozoanthus tunicans	3279
LTR/Gypsy	Palythoa mizigama	3430
LTR/Gypsy	Zoanthus sociatus	4313
LTR/Gypsy	Hydrozoanthus gracilis	4664
LTR/Gypsy	Hydrozoanthus sils	5199
LTR/Gypsy	Zoanthus pulchellus	5668
LTR/Gypsy	Antipathozoanthus remengesaui	7246
LTR/Gypsy	Palythoa tuberculosa	7844
LTR/Gypsy	Zoanthus gigantus	8395
LTR/Gypsy	Zoanthus solanderi	9239
LTR/Gypsy	Sphenopus marsupialis	9256
LTR/Gypsy-Troyka	Parazoanthus swiftii	20
LTR/Gypsy-Troyka	Umimayanthus chanpuru	25
LTR/Gypsy-Troyka	Bergia catenularis	35
LTR/Gypsy-Troyka	Sphenopus marsupialis	48
LTR/Gypsy-Troyka	Hydrozoanthus gracilis	60
LTR/Gypsy-Troyka	Hydrozoanthus sils	253
LTR/Gypsy-Troyka	Zoanthus sociatus	294
LTR/Gypsy-Troyka	Palythoa tuberculosa	305
LTR/Gypsy-Troyka	Zoanthus pulchellus	313
LTR/Gypsy-Troyka	Hydrozoanthus antumbrosus	319
LTR/Gypsy-Troyka	Hydrozoanthus tunicans	321
LTR/Gypsy-Troyka	Bergia puertoricense	356
LTR/Gypsy-Troyka	Antipathozoanthus remengesaui	513
LTR/Gypsy-Troyka	Zoanthus solanderi	816
LTR/Gypsy-Troyka	Zoanthus gigantus	876
LTR/Ngaro	Bergia catenularis	1
LTR/Ngaro	Umimayanthus chanpuru	6
LTR/Ngaro	Bergia puertoricense	13
LTR/Ngaro	Parazoanthus swiftii	25
LTR/Ngaro	Epizoanthus scotinus	45
LTR/Ngaro	Zoanthus solanderi	48
LTR/Ngaro	Zoanthus gigantus	59
LTR/Ngaro	Sphenopus marsupialis	139
LTR/Ngaro	Antipathozoanthus remengesaui	149
LTR/Ngaro	Palythoa tuberculosa	165
LTR/Ngaro	Hydrozoanthus tunicans	189
LTR/Ngaro	Hydrozoanthus antumbrosus	292
LTR/Ngaro	Hydrozoanthus gracilis	499
LTR/Ngaro	Hydrozoanthus sils	643
LTR/Pao	Umimayanthus nakama	544
LTR/Pao	Hydrozoanthus antumbrosus	560
LTR/Pao	Hydrozoanthus tunicans	614
LTR/Pao	Bergia catenularis	637
LTR/Pao	Bergia puertoricense	676
LTR/Pao	Umimayanthus chanpuru	824
LTR/Pao	Palythoa mizigama	954
LTR/Pao	Hydrozoanthus gracilis	1020
LTR/Pao	Hydrozoanthus sils	1575
LTR/Pao	Sphenopus marsupialis	1592
LTR/Pao	Epizoanthus scotinus	1642
LTR/Pao	Palythoa tuberculosa	1896
LTR/Pao	Antipathozoanthus remengesaui	1958
LTR/Pao	Zoanthus solanderi	2221
LTR/Pao	Zoanthus gigantus	2408
LTR/Pao	Zoanthus pulchellus	2412
LTR/Pao	Parazoanthus swiftii	2802
LTR/Pao	Zoanthus sociatus	3142
LTR?	Umimayanthus nakama	11
RC/Helitron	Antipathozoanthus remengesaui	1
RC/Helitron	Parazoanthus swiftii	19
RC/Helitron	Bergia puertoricense	32
RC/Helitron	Bergia catenularis	64
RC/Helitron	Epizoanthus scotinus	177
RC/Helitron	Hydrozoanthus sils	183
RC/Helitron	Umimayanthus chanpuru	205
RC/Helitron	Hydrozoanthus antumbrosus	250
RC/Helitron	Umimayanthus nakama	281
RC/Helitron	Hydrozoanthus gracilis	368
RC/Helitron	Palythoa tuberculosa	524
RC/Helitron	Palythoa mizigama	540
RC/Helitron	Zoanthus gigantus	687
RC/Helitron	Zoanthus solanderi	707
RC/Helitron	Zoanthus sociatus	1082
RC/Helitron	Hydrozoanthus tunicans	1433
RC/Helitron	Sphenopus marsupialis	1588
RC/Helitron	Zoanthus pulchellus	1672
SINE/7SL	Hydrozoanthus gracilis	2
SINE/7SL	Palythoa tuberculosa	10
SINE/7SL	Zoanthus gigantus	11
SINE/7SL	Epizoanthus scotinus	19
SINE/7SL	Hydrozoanthus sils	22
SINE/7SL	Sphenopus marsupialis	44
SINE/Alu	Parazoanthus swiftii	201
SINE/Alu	Epizoanthus scotinus	308
SINE/ID	Sphenopus marsupialis	1
SINE/ID	Palythoa tuberculosa	28
SINE/MIR	Zoanthus solanderi	15
SINE/MIR	Zoanthus sociatus	311
SINE/tRNA	Hydrozoanthus sils	93
SINE/tRNA-Core	Umimayanthus chanpuru	108
SINE/tRNA-Core	Umimayanthus nakama	174
SINE/tRNA-Core	Bergia puertoricense	333
SINE/tRNA-Core	Parazoanthus swiftii	390
SINE/tRNA-Core	Hydrozoanthus sils	1162
SINE/tRNA-Core	Palythoa mizigama	1593
SINE/tRNA-Core	Bergia catenularis	1608
SINE/tRNA-Core	Hydrozoanthus gracilis	2132
SINE/tRNA-Core	Zoanthus gigantus	2317
SINE/tRNA-Core	Zoanthus sociatus	2760
SINE/tRNA-Core	Hydrozoanthus antumbrosus	2983
SINE/tRNA-Core	Hydrozoanthus tunicans	3011
SINE/tRNA-Core	Zoanthus pulchellus	3761
SINE/tRNA-Core	Zoanthus solanderi	6149
SINE/tRNA-Core	Palythoa tuberculosa	6214
SINE/tRNA-Core	Sphenopus marsupialis	6947
SINE/tRNA-Core-L2	Umimayanthus nakama	2
SINE/tRNA-Core-L2	Hydrozoanthus antumbrosus	38
SINE/tRNA-Core-L2	Hydrozoanthus gracilis	82
SINE/tRNA-Core-L2	Umimayanthus chanpuru	117
SINE/tRNA-Core-L2	Bergia catenularis	162
SINE/tRNA-Core-L2	Parazoanthus swiftii	464
SINE/tRNA-Core-L2	Hydrozoanthus sils	1080
SINE/tRNA-Core-RTE	Sphenopus marsupialis	132
SINE/tRNA-Deu	Bergia puertoricense	264
SINE/tRNA-Deu-L2	Sphenopus marsupialis	82
SINE/tRNA-Deu-L2	Antipathozoanthus remengesaui	332
SINE/tRNA-Deu-L2	Zoanthus sociatus	476
SINE/tRNA-Deu-L2	Hydrozoanthus antumbrosus	648
SINE/tRNA-Deu-L2	Palythoa tuberculosa	1018
SINE/tRNA-Deu-L2	Hydrozoanthus tunicans	1310
SINE/tRNA-Deu-L2	Zoanthus gigantus	1663
SINE/tRNA-Deu-L2	Hydrozoanthus gracilis	1769
SINE/tRNA-Deu-L2	Zoanthus pulchellus	1943
SINE/tRNA-Deu-L2	Zoanthus solanderi	2542
SINE/tRNA-Deu-RTE	Zoanthus solanderi	44
SINE/tRNA-Meta	Palythoa tuberculosa	3
SINE/tRNA-Meta	Zoanthus sociatus	23
SINE/tRNA-Meta	Hydrozoanthus gracilis	74
SINE/tRNA-Meta	Sphenopus marsupialis	74
SINE/tRNA-Meta	Bergia puertoricense	126
SINE/tRNA-Meta	Antipathozoanthus remengesaui	129
SINE/tRNA-Meta	Bergia catenularis	142
SINE/tRNA-Meta	Zoanthus solanderi	227
SINE/tRNA-Meta	Palythoa mizigama	676
SINE/tRNA-Meta	Zoanthus pulchellus	1549
SINE/tRNA-Meta	Zoanthus gigantus	2226
SINE/tRNA-Rex	Umimayanthus nakama	42
SINE/tRNA-Rex	Zoanthus sociatus	74
SINE/tRNA-Rex	Bergia catenularis	169
SINE/tRNA-Rex	Bergia puertoricense	383
SINE/tRNA-Rex	Hydrozoanthus sils	465
SINE/tRNA-Rex	Sphenopus marsupialis	531
SINE/tRNA-Rex	Hydrozoanthus tunicans	582
SINE/tRNA-Rex	Parazoanthus swiftii	589
SINE/tRNA-Rex	Zoanthus gigantus	615
SINE/tRNA-Rex	Hydrozoanthus gracilis	1072
SINE/tRNA-Rex	Palythoa tuberculosa	1336
SINE/tRNA-Rex	Hydrozoanthus antumbrosus	1343
SINE/tRNA-Rex	Zoanthus pulchellus	1969
SINE/tRNA-Rex	Palythoa mizigama	2097
SINE/tRNA-RTE	Bergia puertoricense	9
SINE/tRNA-RTE	Palythoa tuberculosa	17
SINE/tRNA-RTE	Zoanthus sociatus	19
SINE/tRNA-RTE	Hydrozoanthus gracilis	49
SINE/tRNA-RTE	Hydrozoanthus tunicans	66
SINE/tRNA-V	Hydrozoanthus antumbrosus	6
SINE/tRNA-V	Epizoanthus scotinus	16
SINE/tRNA-V	Hydrozoanthus tunicans	28
SINE/tRNA-V	Hydrozoanthus gracilis	44
SINE/tRNA-V	Umimayanthus chanpuru	61
SINE/tRNA-V	Umimayanthus nakama	84
SINE/tRNA-V	Bergia catenularis	196
SINE/tRNA-V	Antipathozoanthus remengesaui	292
SINE/tRNA-V	Sphenopus marsupialis	445
SINE/tRNA-V	Zoanthus gigantus	880
