# Supplementary material for: Genome sizes and repeatome evolution in zoantharians (Cnidaria: Hexacorallia: Zoantharia)
Source: PeerJ. 2023 Oct 16;11:e16188. doi: 10.7717/peerj.16188 (PMC10586311; doi:10.7717/peerj.16188)
Supplement: Supplemental Information 13 [file peerj-11-16188-s013.xlsx]

## Sheet: Table S7
Table S9: Annotation and repeat proportions from the clustering of 18 zoantharian species in Repeat Explorer 2.
Annotation	Number of reads	Proportion among repeat (%)
All	212935	0.23
All/repeat	47072	0.05
All/repeat/mobile_element	172447	0.19
All/repeat/mobile_element/Class_I/LINE	45236	0.05
All/repeat/mobile_element/Class_I/LTR	498	0
All/repeat/mobile_element/Class_I/Penelope	22816	0.02
All/repeat/mobile_element/Class_II/Subclass_2/Maverick	35618	0.04
All/repeat/rDNA/45S_rDNA	31175	0.03
All/repeat/rDNA/5S_rDNA	26400	0.03
All/repeat/satellite	332433	0.36
The annotations are represented according to the Repeat Explorer 2 pipeline annotation method of Novák et al. (2020). Proportions are calculated by reporting the number of reads on the total number of reads annotated here. This table shows that 23% of the reads could not be annotated, while respectively 5% and 19% could only be identified as repeats and mobile elements. Among the reads that could…
