# Supplementary material for: Genome sizes and repeatome evolution in zoantharians (Cnidaria: Hexacorallia: Zoantharia)
Source: PeerJ. 2023 Oct 16;11:e16188. doi: 10.7717/peerj.16188 (PMC10586311; doi:10.7717/peerj.16188)
Supplement: Supplemental Information 14 [file peerj-11-16188-s014.xlsx]

## Sheet: Table S8
Table S10: Number of contig and L50 for all dnaPipeTE repeatome assemblies.
Species	Nb of contig	Contig L50 (bp)
Antipathozoanthus obscurus	1452	964
Antipathozoanthus remengesaui	8833	1366
Bergia catenularis	8878	1459
Bergia puertoricense	8831	1443
Epizoanthus iloricatus	8907	1157
Epizoanthus planus	4517	1047
Epizoanthus ramosus	9272	1164
Epizoanthus rinbou	7838	1123
Epizoanthus scotinus	9953	1049
Hydrozoanthus antumbrosus	7022	1075
Hydrozoanthus gracilis	8804	1139
Hydrozoanthus sils	7213	1082
Hydrozoanthus tunicans	7670	1167
Palythoa carribaeorum	10388	1223
Palythoa grandiflora	8441	1170
Palythoa grandis	9180	1126
Palythoa heliodiscus	8530	1249
Palaeozoanthus reticulatus	13616	824
Palythoa mizigama	7261	1081
Palythoa mutuki	7653	1273
Parazoanthus darwini	5897	1192
Parazoanthus swiftii	7422	1223
Palythoa tuberculosa	12626	1182
Sphenopus marsupialis	8654	1147
Umimayanthus chanpuru	8929	1183
Umimayanthus nakama	7792	1364
Umimayanthus parasiticus	7051	1269
Zoanthus gigantus	8713	1127
Zoanthus pulchellus	9939	1199
Zoanthus sansibaricus	6552	1012
Zoanthus sociatus	7767	1208
Zoanthus solanderi	8606	1188
